# Supplementary material for: In situ preparation of double gradient anode materials based on polysiloxane for lithium-ion batteries
Source: Royal Society of Chemistry journal article supplement (doi:10.1039/d3na00285c), 2023-01-01
Supplement: d3na00285c1.pdf [file d3na00285c1.pdf]

## Electronic Supplementary Information

### In situ preparation of double gradient gradient anode materials based on polysiloxane for lithium-ion batteries

Siqi Guan<sup>a</sup>, Chen Xu<sup>a</sup>, Yuanjiang Chen<sup>a</sup>, Yongjin Zhang<sup>a</sup>, Lixiang Li<sup>a, b</sup>, Han Zhang<sup>a</sup>, Baigang An<sup>a, b\*</sup>, Haiming Yang<sup>a, b</sup>, Weimin Zhou<sup>a, b</sup>, Chengguo Sun<sup>a, c</sup>, Dongying Ju<sup>b</sup>, and Xin Geng<sup>a, b\*\*</sup>

<sup>a</sup> Institute of Energy Materials and Electrochemistry Research, University of Science and Technology Liaoning, Anshan 114051, PR China.

<sup>b</sup> Hainan Provincial Key Lab of Fine Chemistry, School of Chemical Engineering and Technology, Hainan University, Haikou 570228, China .

<sup>c</sup> School of Chemical Engineering, Nanjing University of Science and Technology, Nanjing 210094, China

\* Corresponding author.

\*\* Corresponding authors at: Key Laboratory of Energy Materials and Electrochemistry Research Liaoning Province, School of Chemical Engineering, University of Science and Technology Liaoning, Anshan 114051, China.

E-mail: gengxin60@163.com(X. Geng), bgan@ustl.edu.cn (B. An). ;

Siqi Guan: Investigation, Conceptualization, Data curation, Methodology, Project administration, Formal analysis, Writing – original draft.

Chen Xu: Conceptualization, Methodology, Physicochemical characterization.

Yuanjiang Chen: Data curation, Formal analysis.

Yongjin Zhang: Data curation, Formal analysis.

Lixiang Li: Project administration, Writing – review & editing, Formal analysis.

Han Zhang: Methodology, Formal analysis. Haiming Yang: Formal analysis.

Baigang An: Supervision, Project administration, Data curation, Writing – review & editing.

Haiming Yang: Formal analysis.

Weimin Zhou: Formal analysis.

Chengguo Sun: Formal analysis.

Dongying Ju: Methodology, Formal analysis.

Xin Geng: Supervision, Project administration, Methodology, Writing – review & editing.

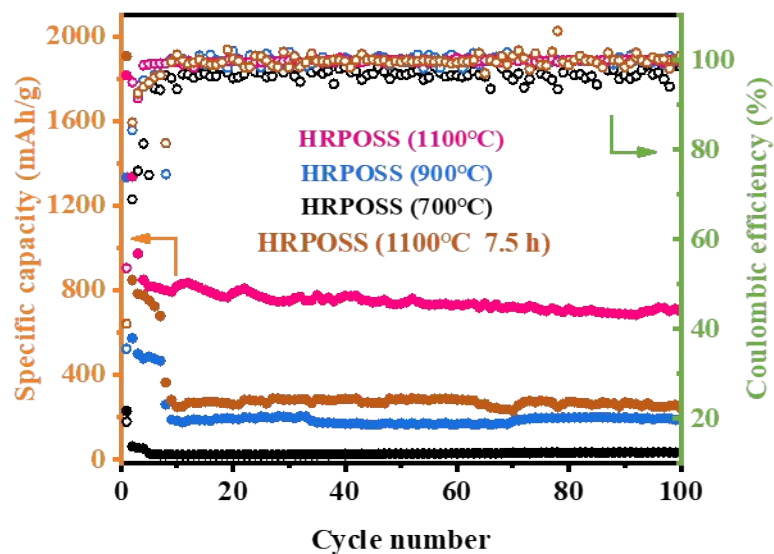

**Fig. S1** Cycling curves of HRPOSS (700 °C, 900 °C, 1100 °C and 1100 °C-7.5 h) at a current density of 0.5 A g<sup>-1</sup>.

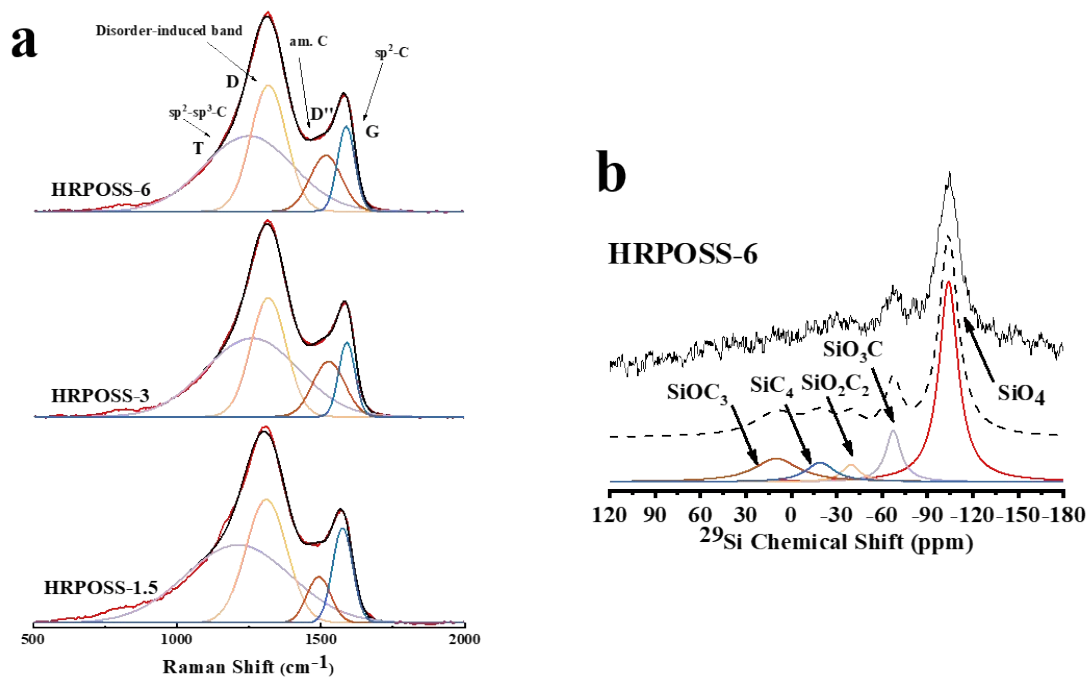

**Fig. S2** (a) The characteristic carbon Raman and their definition, (b) <sup>29</sup>Si MAS-NMR spectra of HRPOSS-6. The experimental spectrum is shown by the bold curve on top, followed by the simulated spectrum (dashed curve), and the individual simulated components (bottom: solid curves).

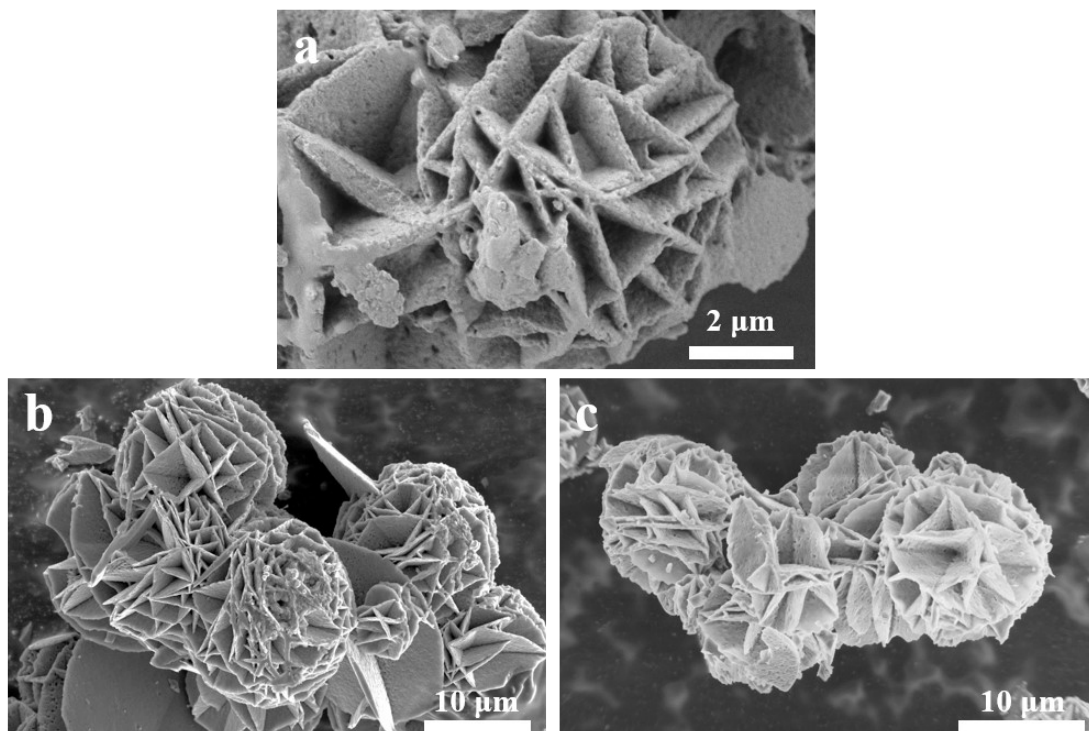

**Fig. S3** SEM images of (a) POSS, (b) HRPOSS-1.5, (c) HRPOSS-3.

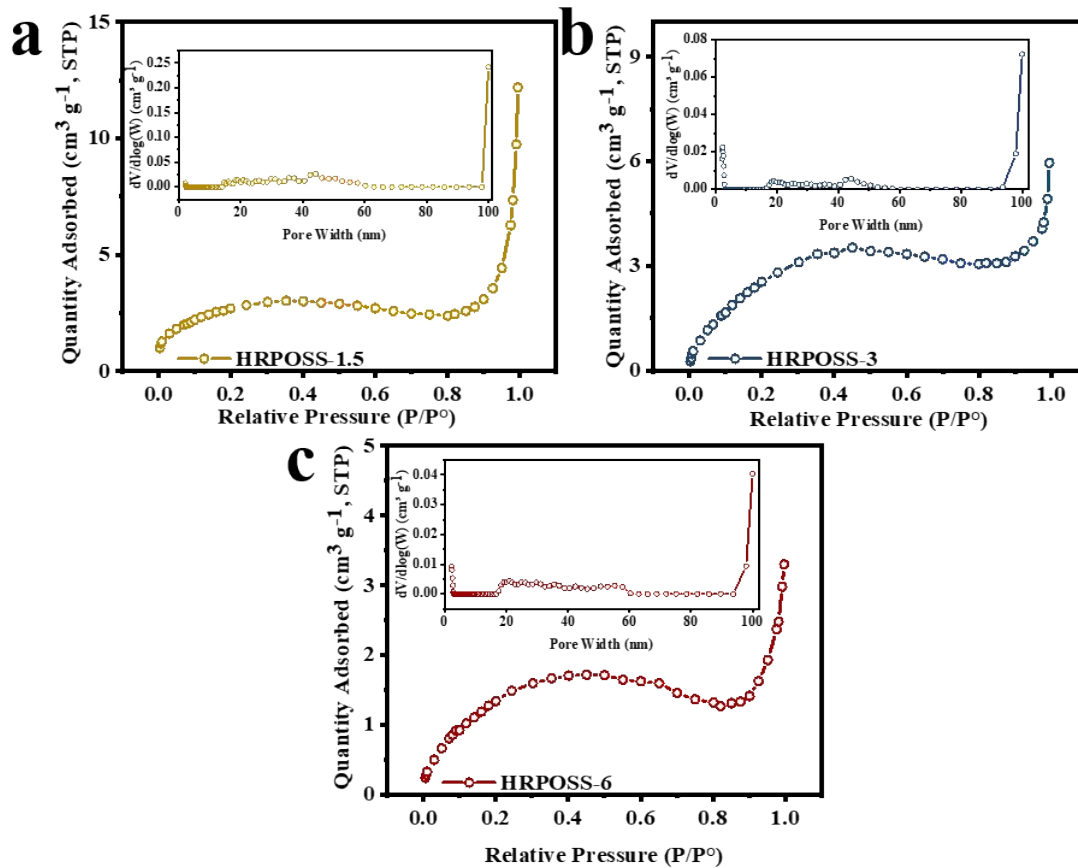

**Fig. S4** Nitrogen adsorption-desorption isotherms and pore size distribution of (a) HRPOSS-1.5, (b) HRPOSS-3, (c) HRPOSS-6.

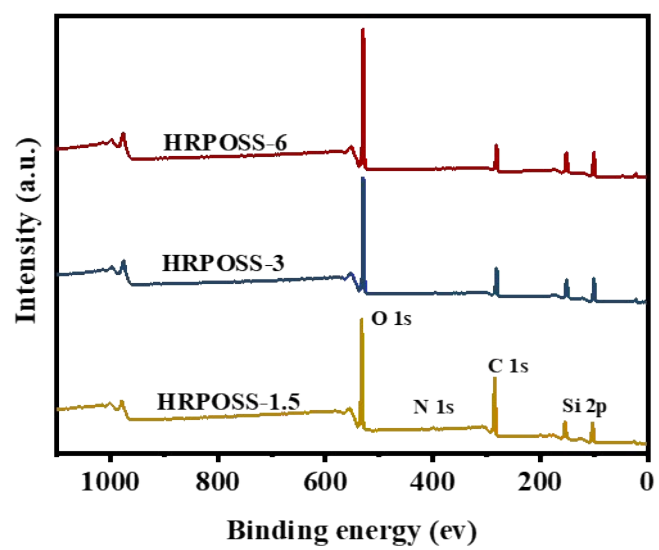

**Fig. S5** XPS survey spectrum on the surface.

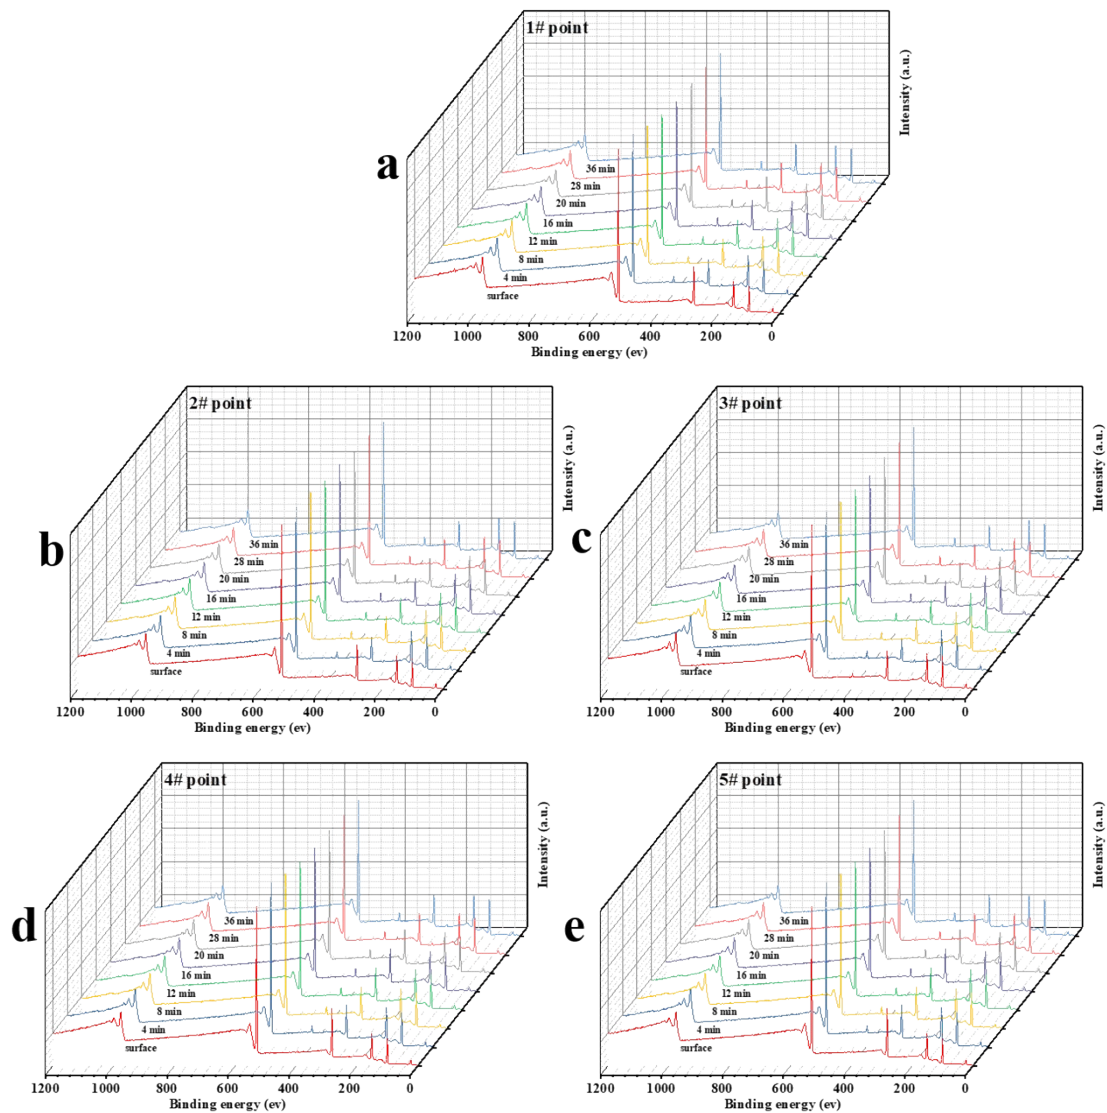

**Fig. S6** XPS survey scan of HRPOSS-6 surface and after etching at 4 min intervals with Ar-ions sputtering at 5 keV (Five sites were randomly selected in a sample test range).

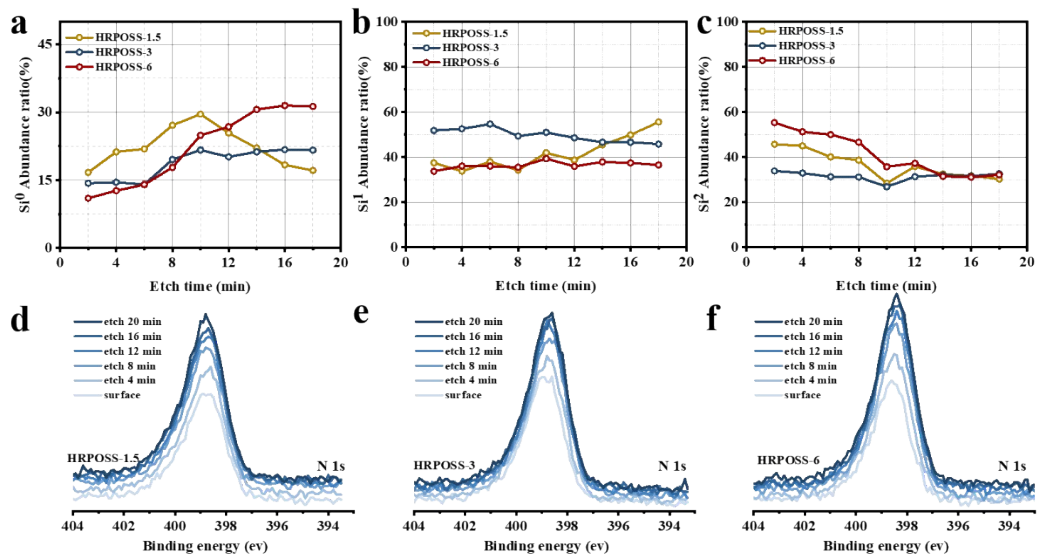

**Fig. S7** Si high resolution spectrum fitting relative chemical state components (a) Si<sup>0+</sup>, (b) Si<sup>1+</sup>, (c) Si<sup>2+</sup> and (d-f) N 1s region of the HRPOSS composites with Ar-ion sputtering.

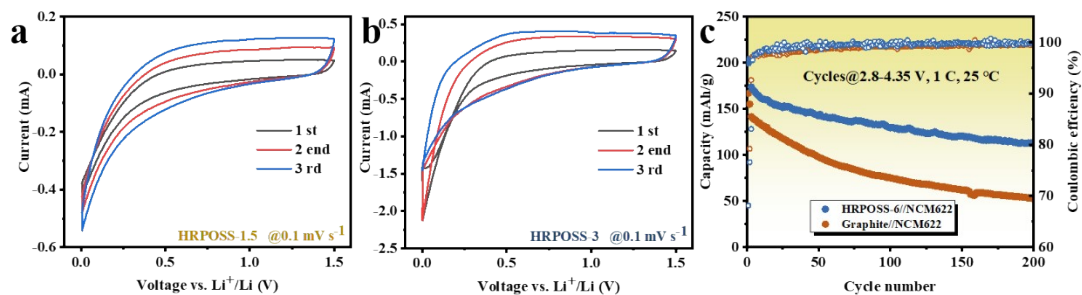

**Fig. S8** (a,b) CV curves of HRPOSS-1.5 and HRPOSS-3, (c) Cycling performance of the Graphite//NCM622 full-cell and the HRPOSS-6//NCM622 full-cell.

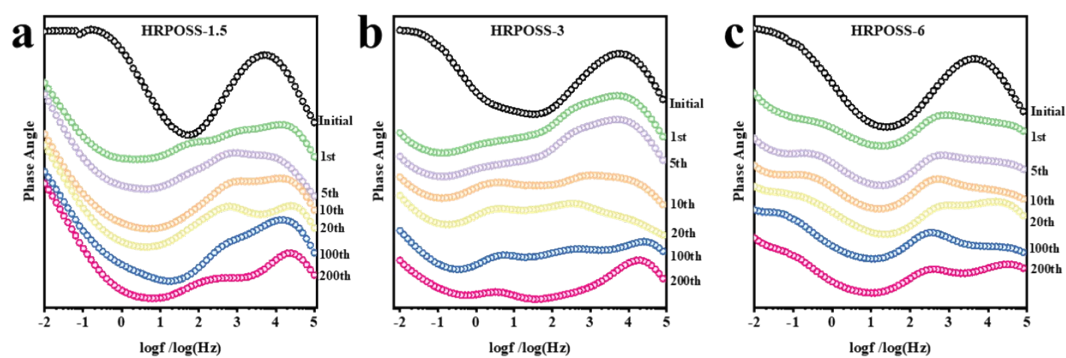

**Fig. S9** (a-c) Bode plot of HRPOSS-1.5, HRPOSS-3 and HRPOSS-6 after various cycles.



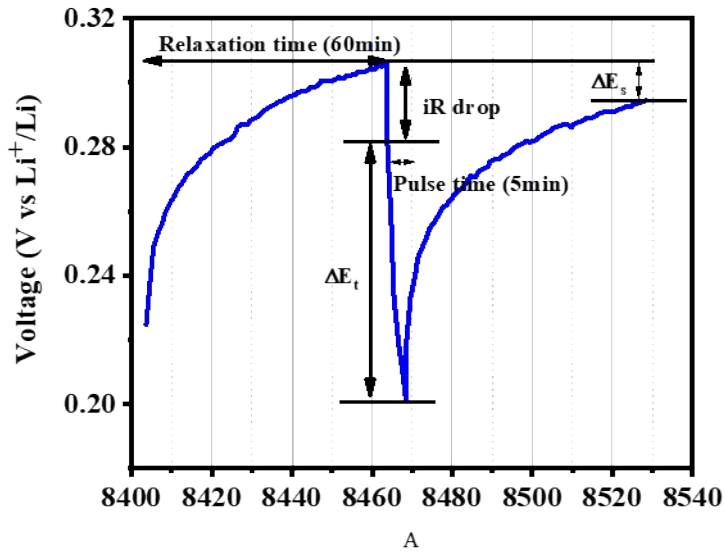

**Fig. S10** E vs. t curves of HRPOSS electrode for a single GITT during discharge process.

The lithium diffusion coefficient was measured by using Galvanostatic Intermittent Titration Technique (GITT) and calculated based on Eq. (S1) as follows:

$$D_{Li^+} = \frac{4}{\pi\tau} \left( \frac{m_B V_M}{M_B S} \right) \left( \frac{\Delta E_s}{\Delta E_t} \right)^2$$

Where  $\tau$  is the relaxation time (s), and  $\Delta E_s$  is the steady-state potential change (V) by the current pulse.  $\Delta E_t$  is the potential change (V) during the constant current pulse after eliminating the iR drop. S is the electrode area and  $V_M$  is the molar volume.

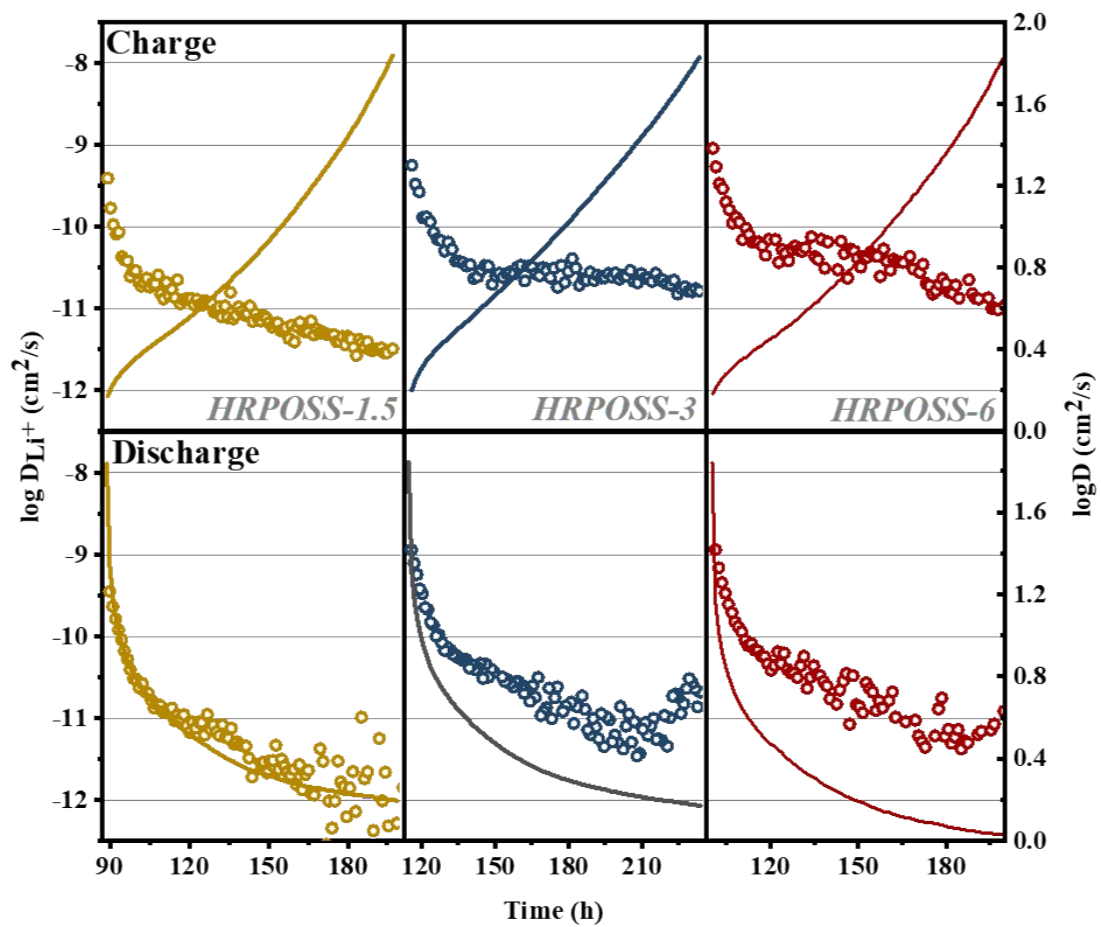

**Fig. S11** GITT curves and the corresponding  $Li^+$  diffusion coefficient at different discharge/charge state of electrodes.

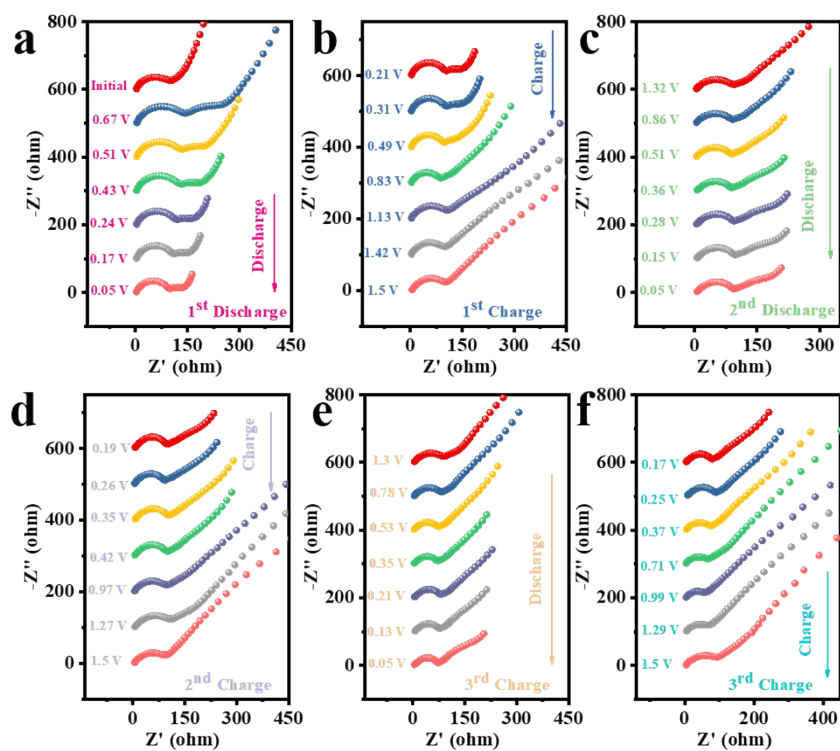

**Fig. S12** Nyquist plots at different discharge/charge state of HRPOSS-6 electrode. (a) 1<sup>st</sup> discharge process, (b) 1<sup>st</sup> charge process, (c) 2<sup>nd</sup> discharge process, (d) 2<sup>nd</sup> charge process, (e) 3<sup>rd</sup> discharge process, (d) 3<sup>rd</sup> charge process.

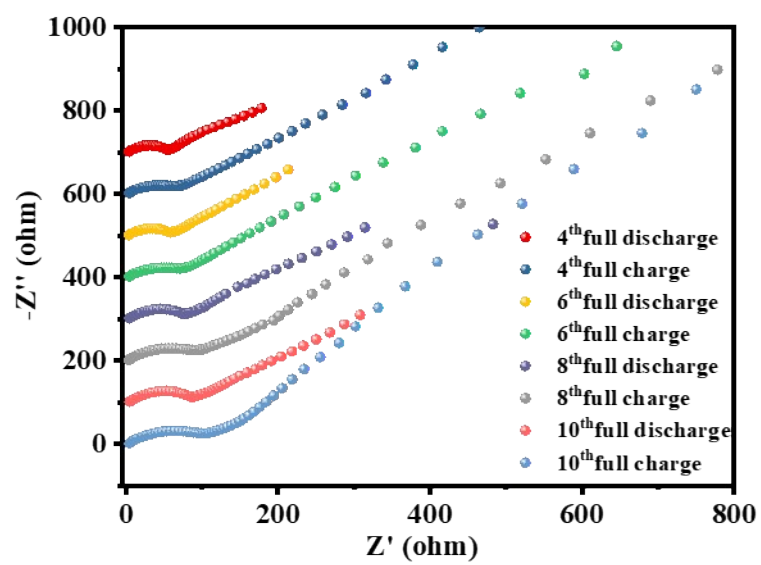

**Fig. S13** Nyquist plots of fully discharged/charged states.

**Table S1** The specific surface area and tapping density parameters

| Samples    | $S_{\text{BET}}/\text{m}^2 \text{ g}^{-1}$ | $S_{\text{micro}}/\text{m}^2 \text{ g}^{-1}$ | Tapping density/ $\text{cm}^3 \text{ g}^{-1}$ |
|------------|--------------------------------------------|----------------------------------------------|-----------------------------------------------|
| POSS       | 13.22                                      | 2.87                                         | -                                             |
| HRPOSS-1.5 | 10.09                                      | 2.72                                         | 0.62                                          |
| HRPOSS-3   | 11.85                                      | 3.02                                         | 0.5                                           |
| HRPOSS-6   | 5.06                                       | 0.45                                         | 0.8                                           |

**Table S2** Percentage of average valence of Si in HRPOSS.

| Samples                    | Average valence of Si |          |          |
|----------------------------|-----------------------|----------|----------|
|                            | HRPOSS-1.5            | HRPOSS-3 | HRPOSS-6 |
| (XPS, Sputtering t=0 min)  | +1.30                 | +1.22    | +1.50    |
| (XPS, Sputtering t=2 min)  | +1.29                 | +1.20    | +1.44    |
| (XPS, Sputtering t=4 min)  | +1.24                 | +1.18    | +1.39    |
| (XPS, Sputtering t=6 min)  | +1.18                 | +1.17    | +1.36    |
| (XPS, Sputtering t=8 min)  | +1.12                 | +1.12    | +1.29    |
| (XPS, Sputtering t=10 min) | +0.99                 | +1.05    | +1.12    |
| (XPS, Sputtering t=12 min) | +1.10                 | +1.11    | +1.10    |
| (XPS, Sputtering t=14 min) | +1.10                 | +1.108   | +1.01    |
| (XPS, Sputtering t=16 min) | +1.13                 | +1.10    | +1.00    |
| (XPS, Sputtering t=18 min) | +1.16                 | +1.11    | +1.01    |

**Table S3** Composition of HRPOSS-6 measured by XPS

| Samples(1# site)           | Atomic Concentrations (%) |      |       |       |
|----------------------------|---------------------------|------|-------|-------|
|                            | Si                        | N    | C     | O     |
| (XPS, Sputtering t=0 min)  | 21.8                      | 1.32 | 30.6  | 46.28 |
| (XPS, Sputtering t=4 min)  | 29.1                      | 3.65 | 22.3  | 44.95 |
| (XPS, Sputtering t=8 min)  | 28.9                      | 4.2  | 24.3  | 42.6  |
| (XPS, Sputtering t=12 min) | 29.43                     | 4.7  | 25.11 | 40.76 |
| (XPS, Sputtering t=16 min) | 29.46                     | 4.8  | 26.04 | 39.7  |
| (XPS, Sputtering t=28 min) | 28.97                     | 4.37 | 27.2  | 39.46 |
| (XPS, Sputtering t=36 min) | 29.97                     | 4.84 | 26.9  | 38.29 |

| Samples(2# site)           | Atomic Concentrations (%) |      |       |       |
|----------------------------|---------------------------|------|-------|-------|
|                            | Si                        | N    | C     | O     |
| (XPS, Sputtering t=0 min)  | 22.23                     | 1.04 | 29.49 | 47.24 |
| (XPS, Sputtering t=4 min)  | 29.76                     | 3.9  | 20.55 | 45.79 |
| (XPS, Sputtering t=8 min)  | 29.95                     | 4.48 | 22.39 | 43.18 |
| (XPS, Sputtering t=12 min) | 30.42                     | 4.47 | 23.26 | 41.85 |
| (XPS, Sputtering t=16 min) | 30.3                      | 5.04 | 23.52 | 41.14 |
| (XPS, Sputtering t=28 min) | 30.27                     | 4.77 | 25.06 | 39.9  |
| (XPS, Sputtering t=36 min) | 31.41                     | 5.12 | 24.72 | 38.75 |

| Samples(3# site)           | Atomic Concentrations (%) |      |       |       |
|----------------------------|---------------------------|------|-------|-------|
|                            | Si                        | N    | C     | O     |
| (XPS, Sputtering t=0 min)  | 25.92                     | 1.38 | 24.8  | 47.9  |
| (XPS, Sputtering t=4 min)  | 30.69                     | 3.52 | 19.92 | 45.87 |
| (XPS, Sputtering t=8 min)  | 31.37                     | 4.39 | 21.33 | 42.91 |
| (XPS, Sputtering t=12 min) | 31.2                      | 4.97 | 22.47 | 41.36 |
| (XPS, Sputtering t=16 min) | 31.74                     | 5.15 | 22.07 | 41.04 |
| (XPS, Sputtering t=28 min) | 31.05                     | 5.09 | 23.9  | 39.96 |
| (XPS, Sputtering t=36 min) | 31.89                     | 5.53 | 23.45 | 39.13 |

| Samples(4# site)           | Atomic Concentrations (%) |      |       |       |
|----------------------------|---------------------------|------|-------|-------|
|                            | Si                        | N    | C     | O     |
| (XPS, Sputtering t=0 min)  | 20.44                     | 1.13 | 35.42 | 43.01 |
| (XPS, Sputtering t=4 min)  | 27.24                     | 3.74 | 26.79 | 42.23 |
| (XPS, Sputtering t=8 min)  | 28.11                     | 4.16 | 26.64 | 41.09 |
| (XPS, Sputtering t=12 min) | 28.61                     | 4.65 | 26.95 | 39.79 |
| (XPS, Sputtering t=16 min) | 28.89                     | 4.82 | 27.42 | 38.87 |
| (XPS, Sputtering t=28 min) | 28.9                      | 4.83 | 28.09 | 38.18 |
| (XPS, Sputtering t=36 min) | 30.02                     | 5.1  | 27.25 | 37.63 |

| Samples(5# site)           | Atomic Concentrations (%) |      |       |       |
|----------------------------|---------------------------|------|-------|-------|
|                            | Si                        | N    | C     | O     |
| (XPS, Sputtering t=0 min)  | 21.34                     | 1.22 | 35.2  | 42.24 |
| (XPS, Sputtering t=4 min)  | 28.57                     | 4.16 | 24.63 | 42.64 |
| (XPS, Sputtering t=8 min)  | 29.24                     | 4.49 | 25.32 | 40.95 |
| (XPS, Sputtering t=12 min) | 29.87                     | 4.59 | 25.7  | 39.84 |
| (XPS, Sputtering t=16 min) | 29.33                     | 4.86 | 26.38 | 39.43 |
| (XPS, Sputtering t=28 min) | 29.84                     | 5.23 | 26.22 | 38.71 |
| (XPS, Sputtering t=36 min) | 30.96                     | 5.41 | 25.45 | 38.18 |
